# Supplementary material
Source: PubMed Central journal article supplement (PMC3428915)
Supplement: NIHMS40359-supplement-1.pdf [file NIHMS40359-supplement-1.pdf]

# Supplementary Information

## **Inheritance of low-frequency regulatory SNPs and a rare null mutation in exon- junction complex subunit *RBM8A* causes TAR**

Cornelis A Albers<sup>1,2,3,\*</sup>, Dirk S Paul<sup>1,\*</sup>, Harald Schulze<sup>4,5,\*</sup>, Kathleen Freson<sup>6</sup>, Jonathan C Stephens<sup>2,3</sup>, Peter A Smethurst<sup>2,3</sup>, Jennifer D Jolley<sup>2,3</sup>, Ana Cvejic<sup>1,2,3</sup>, Myrto Kostadima<sup>7</sup>, Paul Bertone<sup>7</sup>, Martijn H Breuning<sup>8</sup>, Najet Debili<sup>9</sup>, Panos Deloukas<sup>1</sup>, Rémi Favier<sup>9</sup>, Janine Fiedler<sup>5</sup>, Catherine M Hobbs<sup>2,3</sup>, Ni Huang<sup>1</sup>, Matthew E Hurles<sup>1</sup>, Graham Kiddle<sup>2,3</sup>, Ingrid Krapels<sup>10</sup>, Paquita Nurden<sup>11</sup>, Claudia A L Ruivenkamp<sup>8</sup>, Jennifer G Sambrook<sup>2,3</sup>, Kenneth Smith<sup>12,13</sup>, Derek L Stemple<sup>1</sup>, Gabriele Strauss<sup>14</sup>, Chantal Thys<sup>6</sup>, Christel van Geet<sup>6,15</sup>, Ruth Newbury-Ecob<sup>12,13\*</sup>, Willem H Ouwehand<sup>1,2,3\*</sup>, Cedric Ghevaert<sup>2,3,\*</sup>

<sup>1</sup>Wellcome Trust Sanger Institute, Hinxton, Cambridge, UK. <sup>2</sup>Department of Haematology, University of Cambridge, UK. <sup>3</sup>NHS Blood and Transplant, Cambridge, UK. <sup>4</sup>Institute for Transfusion Medicine, Charité Universitätsmedizin, Berlin, Germany. <sup>5</sup>Laboratory for Pediatric Molecular Biology, Charité Universitätsmedizin, Berlin, Germany. <sup>6</sup>Center for Molecular and Vascular Biology, University of Leuven, Leuven, Belgium. <sup>7</sup>European Molecular Biology Laboratory - European Bioinformatics Institute (EMBL-EBI), Hinxton, Cambridge, UK. <sup>8</sup>Clinical Genetics, Leiden University Medical Center, Leiden, The Netherlands. <sup>9</sup>Institut National de la Santé et de la Recherche Médicale, Villejuif, France. <sup>10</sup>Department of Clinical Genetics, Maastricht University Medical Center, Maastricht, the Netherlands. <sup>11</sup>Laboratoire d'Hématologie, Centre de Référence des Pathologies Plaquettaires, Hopital Xavier Arnoz, Pessac, France. <sup>12</sup>Division of Child Health, University of Bristol. <sup>13</sup>Department of Clinical Genetics, St Michael's Hospital, Bristol, UK. <sup>14</sup>Department Pediatric Oncology & Hematology, Charité Universitätsmedizin, Berlin, Germany. <sup>15</sup>Department of Pediatrics, Universitair Ziekenhuis Leuven, Leuven, Belgium.

\*These authors contributed equally

Correspondence should be addressed to C.A.A (caa@sanger.ac.uk) or C.G.

(cg348@cam.ac.uk)

## Supplementary Note

### A. Clinical phenotypes

All study subjects fulfill the diagnostic criteria for TAR syndrome: bilateral radial aplasia in the presence of both thumbs and thrombocytopenia. Further clinical details are given in **Supplementary Table 1**. Informed consent was obtained from all study subjects with approval from the ethics committees of the following institutions: University Hospital Bristol (MREC/00/6/72), Universitair Ziekenhuis Leuven (ML-3580), University of Cambridge (REC 10/H0304/66, REC 10/H0304/65), INSERM (RBM 1-14), and Charité Universitätsmedizin Berlin (EA2/170/05).

### B. Minimal deleted region

Quantitative-PCR primers 4 and 7 from Table 2 in reference<sup>1</sup> were used to define the region that was heterozygously deleted in all 30 TAR cases tested by Klopocki *et al.*<sup>1</sup>. The primer sequences for these amplicons are respectively TGAGTGGTCTTCGGGTGATAGA/CCCATCCCCTGAAAAGTAA and GGAAAATGGTAAAGGGTGGTG/CATCTTCCCTAACCTGGGAGA. The minimal heterozygously deleted region as chr1:145399075-145594214 was defined by mapping of these primers to reference build Hg19.

### C. Statistical significance of observed configurations

From the genotyping of 7504 individuals from the Cambridge BioResource, MAFs of 3.05% and 0.41% were estimated for 5'UTR and intronic SNP respectively. The probability of seeing the 5'UTR or the intronic SNP minor allele on one hapotype is  $1 - (1 - 0.0305) \times (1 - 0.0041) = 0.0345$ . Furthermore, no chromosome 1q21.1 deletion was

observed in 5919 healthy individuals from the Wellcome Trust Case Control Consortium collection of shared controls<sup>2</sup>. Assuming these healthy individuals are drawn at random from a population of 200,000 individuals, if the population allele frequency of the deletion is 0.001, the probability of not seeing a deletion in 5919 samples is  $6 \times 10^{-6}$ . (If the population allele frequency would be 0.0005, the probability of not seeing a deletion in this sample is 0.002). To obtain a conservative estimate of the statistical significance we therefore assumed a population frequency of 0.001 for 1q21.1 deletions.

We estimate that the probability of 53 of 55 TAR cases carrying a 1q21 deletion, and 51 of 53 with a deletion carrying a 5'UTR or the intronic SNP, by chance is

$$\binom{55}{53} \binom{53}{51} 0.001^{53} 0.0345^{51} (1 - 0.001)^2 (1 - 0.0345)^2 = 5 \times 10^{-228}. \text{ This may be interpreted as the}$$

P-value for the association of the 1q21.1 deletion and 5'UTR and intronic SNPs jointly with TAR syndrome.

Assuming a null allele is present on one chromosome, we estimate that the probability of seeing one of the two non-coding SNPs in 53 of 55 TAR cases by chance is

$$\binom{55}{53} 0.0345^{53} (1 - 0.0345)^2 = 4 \times 10^{-75}. \text{ This may be interpreted as the p-value for the}$$

association of the non-coding alleles with TAR syndrome, assuming a null allele is present on the alternate chromosome (deletion or frameshift/nonsense mutation).

The p-value for the independent association of the 5'UTR SNP and intronic SNP with

TAR is respectively  $\binom{55}{41} 0.0305^{41} (1 - 0.0305)^{14} = 2 \times 10^{-50}$  and

$$\binom{55}{12} 0.0041^{12} (1 - 0.0041)^{43} = 8 \times 10^{-18}. \text{ These significance estimates may be compared to}$$

a significance threshold corrected for multiple testing of 50 million sequence variants (approximately the number of SNPs identified by Phase 1 of the 1000 Genomes Project) is  $0.05/50 \times 10^6 = 10^{-9}$ .

#### **D. Trio with genetically unexplained TAR**

Thirty-four trios of mother, father and child with one previously reported example of vertical transmission of TAR<sup>1</sup> were investigated. In all 25 trios of European ancestry where the deletion or frameshift insertion was not inherited *de novo*, the observed mutations were compatible with a compound autosomal recessive mode of inheritance. In the trio with vertical transmission both the affected mother, of non-European ancestry, and her fetus, which on ultrasound showed skeletal features of TAR, carried the typical 1q21.1 deletion. Sequencing of the entire coding fraction, the introns, the 5'UTR, and the promoter of the *RBM8A* gene, as well as a putative regulatory element 4 Kb upstream of the promoter of the *RBM8A* locus (see SOM Table S3 for the regions and primer sequences) showed an absence of the minor alleles of the 5'UTR or the intronic SNP in all three samples and we also did not identify an alternative sequence variant as a potential additional causative allele. Thus, we have failed to identify the second causative allele in this sporadic case of vertical transmission of TAR. We reason that another longer-distance cis-acting, or possibly a trans-acting modifier of the *RBM8A* locus may explain the disorder in this pedigree.

#### **E. Haplotype analysis**

We first determined the recombination rates in the 1q21.1 interval using the recombination rates estimated for the CEU population by the HapMap project, as

distributed as part of the Impute2 phasing software ([http://mathgen.stats.ox.ac.uk/impute/impute\\_v2.html](http://mathgen.stats.ox.ac.uk/impute/impute_v2.html)). From this we inferred that the LD block containing *RBM8A* is approximately given by the NCBI37 coordinates chr1:145200000-145700000, an interval of ~500 kb (**Supplementary Fig. 5A**).

To identify carriers of the 5'UTR and intronic SNP minor allele, we consulted a database of sequence variation for 809 European individuals from the TwinsUK cohort from the UK10K Project (<http://www.uk10k.org>), who were whole-genome sequenced to ~6X coverage. We looked if sequence variants (SNPs as well as small insertions and deletions) of similar minor allele frequencies segregated in the carriers together with the 5'UTR SNP or the intronic SNP minor allele in the LD block containing *RBM8A*, as these variants could potentially be in LD with the 5'UTR SNP or intronic SNP we identified in the TAR cases. Specifically, for the 5'UTR SNP we considered sequence variants with minor allele frequencies (MAFs) between 0.015 and 0.05; for the intronic SNP we considered all variants with a MAF below 0.0075. We then required that at least 70% of the individuals carrying the 5'UTR or intronic minor allele also carried the minor allele for the other variant.

#### *5'UTR SNP*

Among the five TAR cases that we exome sequenced, four carried the 5'UTR SNP minor allele. As these individuals all carried the 1q21.1 deletion as well, we could unambiguously determine the haplotypes for these four TAR cases (**Supplementary Fig. 5B**).

We then consulted the latest release of the 1000 Genomes Project ([ftp://ftp.1000genomes.ebi.ac.uk/vol1/ftp/release/20101123/interim\\_phase1\\_release/](ftp://ftp.1000genomes.ebi.ac.uk/vol1/ftp/release/20101123/interim_phase1_release/)), which contains high-quality phased haplotypes for 381 individuals of European ancestry. We identified 24 individuals carrying the 5'UTR SNP, and we compared the haplotypes on which the 5'UTR SNP minor allele was present in these 1000 Genomes individuals to the haplotypes in the 4 exome sequenced TAR cases (**Supplementary Fig. 5B**).

In the 1000 Genomes Project individuals, a number of distinct haplotypes with the 5'UTR SNP segregate in the LD block containing *RBM8A*. Among our 4 TAR cases, at least two of these are present. Next, we identified one other sequence variant (SNP chr1:145417662 T/C) in the 809 individuals with minor allele frequency between 1.5% and 5% that occurred on the same haplotype as a 5'UTR SNP minor allele in the 1000 Genomes individuals. However, of the 24 1000 Genomes individuals carrying the 5'UTR SNP minor allele, 7 did not carry the chr1:145417662 minor allele. We therefore did not consider this as an alternative candidate causative mutation in the TAR cases carrying the 5'UTR SNP minor allele.

Given that the 5'UTR cases were unrelated and we observed multiple haplotypes, if the 5'UTR SNP locus was not causative we would expect to see independent and likely different mutation events that do not need to co-occur with the 5'UTR SNP in order to cause TAR syndrome. Taken together these data suggest that the 5'UTR SNP minor allele is the causative mutation in the TAR cases carrying this variant.

### *Intronic SNP*

The intronic SNP was not present in the 1000 Genomes Release. We found that 5 individuals in the UKTwins cohort carried the intronic SNP minor allele, in agreement with the frequency we estimated from the Cambridge BioResource.

We then looked in the LD block for SNPs and small insertions and deletions with a similar low allele frequency, variants with an estimated population allele frequency below 0.0075 and present in at least 3 individuals of the 5 individuals (in the cohort of 809 individuals) who carry the intronic SNP minor allele.

We identified two variants satisfying these criteria: a chr1:145483747 C/T SNP (25 kb upstream of *RBM8A*) and a chr1:145273877 G/A SNP (200 kb upstream of *RBM8A*). Using Sanger sequencing we genotyped these SNPs in 11 TAR cases carrying the intronic SNP. We found that the chr1:145483747 SNP was present in all of these TAR cases together with the intronic SNP, but not the chr1:145273877 SNP. Thus, in contrast with the 5'UTR SNP, the intronic SNP seems to segregate on a single rare haplotype that contains at least one sequence variant of similar low frequency.

The data from the ENCODE Project and our own FAIRE-Seq open-chromatin data in megakaryocytes indicate that this additional SNP is not located in a regulatory region, whereas the intronic SNP is. Increased protein binding to the minor allele further corroborates the assumption that the intronic SNP is causative. We cannot exclude the possibility that the 5'UTR SNP or the intronic SNP are not the causative variants; however, in light of the biological and genetic evidence we believe this is unlikely.

Finally, because of the 10-fold lower frequency of the intronic SNP, we resequenced the complete *RBM8A* gene (exons, introns, 5'UTR and 3'UTR) in two TAR cases carrying the *RBM8A* intronic SNP to exclude variants that might have been undetected in the 809 individuals. However, we could not identify other variants in the *RBM8A* gene unit with similar frequency as the intronic SNP.

#### **F. Association with platelet count**

Platelet count was available for 6805 and 6938 of the 7504 healthy individuals genotyped for respectively the 5'UTR SNP and the intronic SNP. The log-transformed platelet count on genotype was regressed using an additive genetic model adjusted for age in years at date of venesection and gender. For both SNPs there was no statistically significant effect on platelet count (**Supplementary Table 3**). Although the SNPs were directly genotyped, power to detect subtle effects of the SNPs on platelet count is limited due to the low MAF of both SNPs. Also, since the low platelet count in TAR cases often recovers in adolescence, and >94% of the genotyped Cambridge BioResource individuals were older than 20 years, power to detect an effect of the SNP on platelet count is expected to be limited.

#### **G. Cambridge BioResource**

The Cambridge BioResource (ref. <sup>3</sup> and <http://www.cambridgebioresource.org.uk>) is funded by the National Institute for Health Research Cambridge Biomedical Research Centre. Informed consent was obtained from all volunteers upon recruitment to the Cambridge BioResource for the collection and use of DNA samples for genotyping and for association testing with phenotypic traits.



## Supplementary Tables

| Unique Case Number         | TAR diagnosed | Heterozygous 1q21 deletion                          | 1q21 deletion origin (de novo, parent, Unkn.) | Genotype 5'UTR SNP 145507646 G/A | Genotype intronic SNP 145507765 G/C | Sex   | Age (years) | Gestation / Delivery (weeks) | BW (g) | Neonatal Problems | Lowest platelet count (x 10 <sup>9</sup> /L) | Highest platelet count (x 10 <sup>9</sup> /L) | Upper limb abnormality                                     | Lower limb abnormality | Cardio-vascular abnormality | Cows milk intolerance |
|----------------------------|---------------|-----------------------------------------------------|-----------------------------------------------|----------------------------------|-------------------------------------|-------|-------------|------------------------------|--------|-------------------|----------------------------------------------|-----------------------------------------------|------------------------------------------------------------|------------------------|-----------------------------|-----------------------|
| 1                          | Yes           | Yes                                                 | De novo                                       | A/Del                            | G/Del                               | M     | 31          | Unkn.                        | Unkn.  | Diarrhoea         | 110                                          | 111                                           | Radii absent or hypoplastic                                | Yes                    | No                          | Unkn.                 |
| 105 (mother of 1)          | No            | No                                                  |                                               | G/G                              | G/G                                 |       |             |                              |        |                   |                                              |                                               |                                                            |                        |                             |                       |
| 106 (mother of 1)          | No            | No                                                  |                                               | G/A                              | G/G                                 |       |             |                              |        |                   |                                              |                                               |                                                            |                        |                             |                       |
| 2                          | Yes           | Yes                                                 | De novo                                       | A/Del                            | G/Del                               | F     | 6 months    | 41                           | 3549   | Bruising          | 7                                            | 20                                            | Radii absent or hypoplastic                                | Yes                    | No                          | Unkn.                 |
| 109 (mother of 2)          | No            | No                                                  |                                               | G/G                              | G/G                                 |       |             |                              |        |                   |                                              |                                               |                                                            |                        |                             |                       |
| 110 (father of 2)          | No            | No                                                  |                                               | G/A                              | G/G                                 |       |             |                              |        |                   |                                              |                                               |                                                            |                        |                             |                       |
| 3                          | Yes           | Yes                                                 | Maternal                                      | G/Del                            | C/Del                               | F     | 14          | Unkn.                        | 3232   | Bruising          | 90                                           | 140                                           | Radii absent or hypoplastic                                | Yes                    | Unkn.                       | Yes                   |
| 103 (mother of 3)          | No            | No                                                  |                                               | G/Del                            | G/Del                               |       |             |                              |        |                   |                                              |                                               |                                                            |                        |                             |                       |
| 104 (father of 3)          | No            | No                                                  |                                               | G/G                              | G/C                                 |       |             |                              |        |                   |                                              |                                               |                                                            |                        |                             |                       |
| 4                          | Yes           | Yes                                                 | Paternal                                      | A/Del                            | G/Del                               | F     | 14          | Unkn.                        | Unkn.  | Unkn.             | 112                                          |                                               | Radii absent or hypoplastic                                | Unkn.                  | Unkn.                       | Unkn.                 |
| 107 (mother of 4)          | No            | No                                                  |                                               | G/A                              | G/G                                 |       |             |                              |        |                   |                                              |                                               |                                                            |                        |                             |                       |
| 108 (father of 4)          | No            | Yes                                                 |                                               | G/Del                            | G/Del                               |       |             |                              |        |                   |                                              |                                               |                                                            |                        |                             |                       |
| 5                          | Yes           | Yes                                                 | Paternal                                      | A/Del                            | G/Del                               | F     | 29          | 40                           | 3175   | Tube fed          | 11                                           | 78                                            | Radii absent or hypoplastic                                | no                     | No                          | No                    |
| 111 (mother of 5)          | No            | No                                                  |                                               | G/A                              | G/G                                 |       |             |                              |        |                   |                                              |                                               |                                                            |                        |                             |                       |
| 112 (father of 5)          | No            | Yes                                                 |                                               | G/Del                            | G/Del                               |       |             |                              |        |                   |                                              |                                               |                                                            |                        |                             |                       |
| 6                          | Yes           | Yes                                                 | Paternal                                      | A/Del                            | G/Del                               | F     | 28.5        | 40                           | 2900   | Unkn.             | 101                                          | 142                                           | Radii absent or hypoplastic                                | Yes                    | No                          | Yes                   |
| 81 (mother of 6)           | No            | No                                                  |                                               | A/A                              | G/G                                 |       |             |                              |        |                   |                                              |                                               |                                                            |                        |                             |                       |
| 82 (father of 6)           | No            | Yes                                                 |                                               | G/Del                            | G/Del                               |       |             |                              |        |                   |                                              |                                               |                                                            |                        |                             |                       |
| 7                          | Yes           | Yes                                                 | Maternal                                      | A/Del                            | G/Del                               | F     | 22          | Unkn.                        | Unkn.  | Unkn.             | 12                                           | 59                                            | Radii absent or hypoplastic                                | Yes                    | Yes                         | No                    |
| 90 (mother of 7)           | No            | No                                                  |                                               | G/A                              | G/G                                 |       |             |                              |        |                   |                                              |                                               |                                                            |                        |                             |                       |
| 91 (father of 7)           | No            | Yes                                                 |                                               | G/Del                            | G/Del                               |       |             |                              |        |                   |                                              |                                               |                                                            |                        |                             |                       |
| 8                          | Yes           | Yes                                                 | De novo                                       | A/Del                            | G/Del                               | F     | 2 days      | Unkn.                        | Unkn.  | Unkn.             | Unkn.                                        | 20                                            | Radii absent or hypoplastic                                | Yes                    | No                          | No                    |
| 99 (mother of 8)           | No            | No                                                  |                                               | A/A                              | G/G                                 |       |             |                              |        |                   |                                              |                                               |                                                            |                        |                             |                       |
| 100 (father of 8)          | No            | No                                                  |                                               | G/A                              | G/G                                 |       |             |                              |        |                   |                                              |                                               |                                                            |                        |                             |                       |
| 10                         | Yes           | Yes                                                 | Paternal                                      | A/Del                            | G/Del                               | M     | 28          | 40                           | 2900   | Bleeding          | 8                                            | 120                                           | Absence of radius with hypoplasia of humerus and ulna      | No                     | No                          | Yes                   |
| 11 (father of 10)          | No            | Yes                                                 |                                               | G/G                              | G/G                                 |       |             |                              |        |                   |                                              |                                               |                                                            |                        |                             |                       |
| 12 (mother of 10)          | No            | No                                                  |                                               | G/A                              | G/G                                 |       |             |                              |        |                   |                                              |                                               |                                                            |                        |                             |                       |
| 13                         | Yes           | Yes                                                 | Maternal                                      | A/Del                            | G/Del                               | F     | 5           | 40                           | 2670   | Phototherapy      | 37                                           | 43                                            | Radii absent or hypoplastic                                | Yes                    | No                          | No                    |
| 14 (father of 13)          | No            | No                                                  |                                               | A/A                              | G/G                                 |       |             |                              |        |                   |                                              |                                               |                                                            |                        |                             |                       |
| 15 (mother of 13)          | No            | Yes                                                 |                                               | G/G                              | G/G                                 |       |             |                              |        |                   |                                              |                                               |                                                            |                        |                             |                       |
| 16                         | Yes           | Yes                                                 | Paternal                                      | A/Del                            | G/Del                               | F     | 15          | 40                           | 3150   | Bleeding          | 29                                           | 64                                            | Absence of radius, ulna and humerus. Hypoplasia of scapula | Yes                    | No                          | Yes                   |
| 17 (father of 16)          | No            | Yes                                                 |                                               | G/G                              | G/G                                 |       |             |                              |        |                   |                                              |                                               |                                                            |                        |                             |                       |
| 18 (mother of 16)          | No            | No                                                  |                                               | G/A                              | G/C                                 |       |             |                              |        |                   |                                              |                                               |                                                            |                        |                             |                       |
| 19                         | Yes           | Yes                                                 | Unkn.                                         | A/Del                            | G/Del                               | Unkn. | 23          | 40                           | Unkn.  | None              | 26                                           | 133                                           | Radii absent or hypoplastic                                | Yes                    | No                          | No                    |
| 20                         | Yes           | Yes                                                 | Unkn.                                         | A/Del                            | G/Del                               | Unkn. | 23          | 40                           | 2750   | Petechiae         | 10                                           | 110                                           | Radii absent or hypoplastic                                | No                     | No                          | No                    |
| 21                         | Yes           | Yes                                                 | Unkn.                                         | A/Del                            | G/Del                               | Unkn. | 26          | 40                           | Unkn.  | None              | 20                                           | 53                                            | Radii absent or hypoplastic                                | Yes                    | No                          | No                    |
| 22                         | Yes           | Yes                                                 | Unkn.                                         | A/Del                            | G/Del                               | Unkn. | 27          | 40                           | Unkn.  | None              | 10                                           | 40                                            | Radii absent or hypoplastic                                | No                     | No                          | Yes                   |
| 23                         | Yes           | Yes                                                 | De novo                                       | A/Del                            | G/Del                               | Unkn. | Unkn.       | Unkn.                        | Unkn.  | Unkn.             | Unkn.                                        | Unkn.                                         | Unkn.                                                      | Unkn.                  | Unkn.                       | Unkn.                 |
| 24 (parent of 23)          | No            | No                                                  |                                               | G/G                              | G/G                                 |       |             |                              |        |                   |                                              |                                               |                                                            |                        |                             |                       |
| 25 (parent of 23)          | No            | No                                                  |                                               | G/A                              | G/G                                 |       |             |                              |        |                   |                                              |                                               |                                                            |                        |                             |                       |
| 33                         | Yes           | Heterozygous frameshift insertion 145508476 T/TAGCG | N/A                                           | G/A                              | G/G                                 | M     | 29          | 41                           | 3110   | Petechiae         | 13                                           | Unkn.                                         | Unkn.                                                      | Unkn.                  | Unkn.                       | Yes                   |
| 31 (parent of 33)          | No            | Heterozygous frameshift insertion 145508476 T/TAGCG |                                               | G/G                              | G/G                                 |       |             |                              |        |                   |                                              |                                               |                                                            |                        |                             |                       |
| 32 (parent of 33)          | No            | No                                                  |                                               | G/A                              | G/G                                 |       |             |                              |        |                   |                                              |                                               |                                                            |                        |                             |                       |
| 40                         | Yes           | Yes                                                 | Parent                                        | A/Del                            | G/Del                               | Unkn. | Unkn.       | Unkn.                        | Unkn.  | Unkn.             | Unkn.                                        | Unkn.                                         | Unkn.                                                      | Unkn.                  | Unkn.                       | Unkn.                 |
| 41                         | Yes           | Yes                                                 | Parent                                        | A/Del                            | G/Del                               | Unkn. | Unkn.       | Unkn.                        | Unkn.  | Unkn.             | Unkn.                                        | Unkn.                                         | Unkn.                                                      | Unkn.                  | Unkn.                       | Unkn.                 |
| 38 (parent 1 of 40 and 41) | No            | Yes                                                 |                                               | G/Del                            | G/Del                               |       |             |                              |        |                   |                                              |                                               |                                                            |                        |                             |                       |
| 39 (parent 2 of 40 and 41) | No            | No                                                  |                                               | G/A                              | G/G                                 |       |             |                              |        |                   |                                              |                                               |                                                            |                        |                             |                       |
| 42                         | Yes           | Yes                                                 | Maternal                                      | G/Del                            | C/Del                               | F     | 17          | 40                           | 2750   | Unkn.             | 9                                            | 58                                            | Radii absent or hypoplastic                                | No                     | No                          | Yes                   |
| 43 (mother of 42)          | No            | Yes                                                 |                                               | G/G                              | G/G                                 |       |             |                              |        |                   |                                              |                                               |                                                            |                        |                             |                       |
| 44 (father of 42)          | No            | No                                                  |                                               | G/G                              | G/C                                 |       |             |                              |        |                   |                                              |                                               |                                                            |                        |                             |                       |
| 47                         | Yes           | Yes                                                 | Maternal                                      | A/Del                            | G/Del                               | M     | 4 months    | 40                           | 3450   | Unkn.             | 30                                           | 233                                           | Radii absent or hypoplastic                                | Yes                    | No                          | No                    |
| 48 (mother of 47)          | No            | Yes                                                 |                                               | G/Del                            | G/Del                               |       |             |                              |        |                   |                                              |                                               |                                                            |                        |                             |                       |
| 49 (father of 47)          | No            | No                                                  |                                               | G/A                              | G/Del                               |       |             |                              |        |                   |                                              |                                               |                                                            |                        |                             |                       |
| 50                         | Yes           | Yes                                                 | Maternal                                      | A/Del                            | G/Del                               | M     | 26          | Unkn.                        | Unkn.  | Unkn.             | Unkn.                                        | 163                                           | Radii absent or hypoplastic                                | Yes                    | No                          | No                    |
| 51 (mother of 50)          | No            | Yes                                                 |                                               | G/Del                            | G/Del                               |       |             |                              |        |                   |                                              |                                               |                                                            |                        |                             |                       |
| 52 (father of 50)          | No            | No                                                  |                                               | G/A                              | G/G                                 |       |             |                              |        |                   |                                              |                                               |                                                            |                        |                             |                       |
| 53                         | Yes           | Yes                                                 | Paternal                                      | A/Del                            | G/Del                               | F     | 1           | Unkn.                        | 2610   | None              | 10                                           | 28                                            | Radii absent or hypoplastic                                | Yes                    | No                          | No                    |
| 54 (mother of 53)          | No            | No                                                  |                                               | G/A                              | G/G                                 |       |             |                              |        |                   |                                              |                                               |                                                            |                        |                             |                       |
| 55 (father of 53)          | No            | Yes                                                 |                                               | G/Del                            | G/Del                               |       |             |                              |        |                   |                                              |                                               |                                                            |                        |                             |                       |
| 56                         | Yes           | Yes                                                 | De novo                                       | A/Del                            | G/Del                               | F     | 34          | Unkn.                        | Unkn.  | Unkn.             | Unkn.                                        | Unkn.                                         | Radii absent or hypoplastic                                | Yes                    | No                          | No                    |
| 57 (mother of 56)          | No            | No                                                  |                                               | G/G                              | G/G                                 |       |             |                              |        |                   |                                              |                                               |                                                            |                        |                             |                       |
| 58 (father of 56)          | No            | No                                                  |                                               | G/A                              | G/G                                 |       |             |                              |        |                   |                                              |                                               |                                                            |                        |                             |                       |
| 59                         | Yes           | Yes                                                 | De novo                                       | A/Del                            | G/Del                               | M     | 26          | Unkn.                        | 2600   | Unkn.             | 10                                           | 200                                           | Radii absent or hypoplastic                                | Yes                    | Unkn.                       | Unkn.                 |
| 60 (mother of 59)          | No            | No                                                  |                                               | G/G                              | G/G                                 |       |             |                              |        |                   |                                              |                                               |                                                            |                        |                             |                       |
| 61 (father of 59)          | No            | No                                                  |                                               | G/A                              | G/G                                 |       |             |                              |        |                   |                                              |                                               |                                                            |                        |                             |                       |

| Unique Case Number       | TAR diagnosed | Heterozygous 1q21 deletion                        | 1q21 deletion origin (de novo, parent, unknown) | Genotype SUTR SNP 145507646 G/A | Genotype Intronic SNP 145507765 G/C | Sex     | Age(years) | Gestation/ Delivery (weeks) | BW (g)  | Neonatal Problems | Lowest platelet count (x 10 <sup>9</sup> /L) | Highest platelet count (x 10 <sup>9</sup> /L) | Upper limb abnormality      | Lower limb abnormality | Cardio-vascular abnormality | Cows milk intolerance |
|--------------------------|---------------|---------------------------------------------------|-------------------------------------------------|---------------------------------|-------------------------------------|---------|------------|-----------------------------|---------|-------------------|----------------------------------------------|-----------------------------------------------|-----------------------------|------------------------|-----------------------------|-----------------------|
| 64                       | Yes           | Yes                                               | Unknown                                         | G/Del                           | C/Del                               | M       | 23         | Unknown                     | Unknown | Unknown           | 94                                           | 155                                           | Radii absent or hypoplastic | Yes                    | Unknown                     | Unknown               |
| 65                       | Yes           | Yes                                               | Maternal                                        | A/Del                           | G/Del                               | F       | 34         | Unknown                     | Unknown | Unknown           | 79                                           | 142                                           | Radii absent or hypoplastic | Unknown                | Unknown                     | Unknown               |
| 66 (mother of 65)        | No            | Yes                                               |                                                 | G/Del                           | G/Del                               |         |            |                             |         |                   |                                              |                                               |                             |                        |                             |                       |
| 67 (father of 65)        | No            | No                                                |                                                 | G/A                             | G/G                                 |         |            |                             |         |                   |                                              |                                               |                             |                        |                             |                       |
| 68                       | Yes           | Yes                                               | Maternal                                        | G/Del                           | C/Del                               | M       | 1.5        | Unknown                     | Unknown | Unknown           | 79                                           | 169                                           | Radii absent or hypoplastic | Unknown                | Unknown                     | Unknown               |
| 69 (mother of 68)        | No            | Yes                                               |                                                 | G/Del                           | G/Del                               |         |            |                             |         |                   |                                              |                                               |                             |                        |                             |                       |
| 70                       | Yes           | Yes                                               | Maternal                                        | G/Del                           | C/Del                               | F       | 18         | 38                          | 2600    | None              | 34                                           | 154                                           | Radii absent or hypoplastic | Yes                    | No                          | Unknown               |
| 71                       | Yes           | Yes                                               | Maternal                                        | G/Del                           | C/Del                               | F       | 6 months   | 39                          | 3510    | Unknown           | 30                                           | 200                                           | Radii absent or hypoplastic | Yes                    | Unknown                     | Unknown               |
| 72 (mother of 70 and 71) | No            | Yes                                               |                                                 | G/Del                           | G/Del                               |         |            |                             |         |                   |                                              |                                               |                             |                        |                             |                       |
| 73 (father of 70 and 71) | No            | No                                                |                                                 | G/G                             | G/C                                 |         |            |                             |         |                   |                                              |                                               |                             |                        |                             |                       |
| 74                       | Yes           | Yes                                               | Unknown                                         | G/Del                           | C/Del                               | M       | 39         | Unknown                     | Unknown | Unknown           | 79                                           | 169                                           | Radii absent or hypoplastic | Yes                    | No                          | No                    |
| 75 (mother of 74)        | No            | Yes                                               |                                                 | G/Del                           | G/Del                               |         |            |                             |         |                   |                                              |                                               |                             |                        |                             |                       |
| 76                       | Yes           | Yes                                               | Maternal                                        | G/Del                           | C/Del                               | M       | 2          | 40                          | 3220    | Bleeding          | 8                                            | 130                                           | Radii absent or hypoplastic | Yes                    | No                          | Unknown               |
| 77 (mother of 76)        | No            | Yes                                               |                                                 | G/Del                           | G/Del                               |         |            |                             |         |                   |                                              |                                               |                             |                        |                             |                       |
| 78 (father of 76)        | No            | No                                                |                                                 | G/G                             | G/C                                 |         |            |                             |         |                   |                                              |                                               |                             |                        |                             |                       |
| 83                       | Yes           | Yes                                               | Non Maternal                                    | A/Del                           | G/Del                               | F       | 37         | Unknown                     | Unknown | None              | 74                                           | 136                                           | Radii absent or hypoplastic | Yes                    | Unknown                     | Unknown               |
| 84 (mother of 83)        | No            | No                                                |                                                 | G/G                             | G/G                                 |         |            |                             |         |                   |                                              |                                               |                             |                        |                             |                       |
| 85                       | Yes           | Yes                                               | De novo                                         | A/Del                           | G/Del                               | F       | 17 days    | 37                          | 2800    | Unknown           | Unknown                                      | 167                                           | Radii absent or hypoplastic | no                     | Yes                         | No                    |
| 87 (father of 85)        | No            | No                                                |                                                 | G/A                             | G/G                                 |         |            |                             |         |                   |                                              |                                               |                             |                        |                             |                       |
| 90 (mother of 85)        | No            | No                                                |                                                 | G/A                             | G/G                                 |         |            |                             |         |                   |                                              |                                               |                             |                        |                             |                       |
| 88                       | Yes           | Yes                                               | Unknown                                         | A/Del                           | G/Del                               | F       | 4          | Unknown                     | 2720    | Unknown           | Unknown                                      | 34                                            | Radii absent or hypoplastic | No                     | Unknown                     | Unknown               |
| 89                       | Yes           | Yes                                               | Unknown                                         | G/Del                           | C/Del                               | M       | 8          | Unknown                     | Unknown | Unknown           | Unknown                                      | 88                                            | Radii absent or hypoplastic | Yes                    | Unknown                     | Unknown               |
| 92                       | Yes           | Yes                                               | De novo                                         | A/Del                           | G/Del                               | M       | 1.5        | Unknown                     | Unknown | Unknown           | 7                                            | 65                                            | Radii absent or hypoplastic | Unknown                | Unknown                     | Unknown               |
| 93 (mother of 92)        | No            | No                                                |                                                 | G/G                             | G/G                                 |         |            |                             |         |                   |                                              |                                               |                             |                        |                             |                       |
| 94 (father of 92)        | No            | No                                                |                                                 | G/A                             | G/G                                 |         |            |                             |         |                   |                                              |                                               |                             |                        |                             |                       |
| 95                       | Yes           | Yes                                               | Maternal                                        | A/Del                           | G/Del                               | M       | 6          | 39                          | 2900    | Unknown           | 18                                           | 180                                           | Radii absent or hypoplastic | Yes                    | Yes                         | Unknown               |
| 96 (mother of 95)        | No            | Yes                                               |                                                 | G/Del                           | G/Del                               |         |            |                             |         |                   |                                              |                                               |                             |                        |                             |                       |
| 97 (father of 95)        | No            | No                                                |                                                 | G/A                             | G/G                                 |         |            |                             |         |                   |                                              |                                               |                             |                        |                             |                       |
| 98                       | Yes           | Yes                                               | Unknown                                         | A/Del                           | G/Del                               | F       | 4          | 40                          | 2910    | None              | 7                                            | 295                                           | Radii absent or hypoplastic | No                     | No                          | Yes                   |
| 101                      | Yes           | Yes                                               | Unknown                                         | A/Del                           | G/Del                               | F       | 17         | Unknown                     | Unknown | Unknown           | 31                                           | 91                                            | Radii absent or hypoplastic | Yes                    | Unknown                     | Unknown               |
| 102 (mother of 101)      | No            | Yes                                               |                                                 | G/Del                           | G/Del                               |         |            |                             |         |                   |                                              |                                               |                             |                        |                             |                       |
| 113                      | Yes           | Yes                                               | Unknown                                         | A/Del                           | G/Del                               | Unknown | Unknown    | Unknown                     | Unknown | Unknown           | Unknown                                      | Unknown                                       | Unknown                     | Unknown                | Unknown                     | Unknown               |
| 114                      | Yes           | Yes                                               | De novo                                         | G/Del                           | C/Del                               | Unknown | 8          | 42                          | 2960    | Bleeding          | Unknown                                      | 43                                            | Radii absent or hypoplastic | Yes                    | No                          | No                    |
| 115 (parent of 114)      | No            | No                                                |                                                 | G/G                             | G/G                                 |         |            |                             |         |                   |                                              |                                               |                             |                        |                             |                       |
| 131 (parent of 114)      | No            | No                                                |                                                 | G/G                             | G/C                                 |         |            |                             |         |                   |                                              |                                               |                             |                        |                             |                       |
| 116                      | Yes           | Yes                                               | Maternal                                        | A/Del                           | G/Del                               | F       | 8          | 40                          | 3062    | Bleeding          | 12                                           | 91                                            | Radii absent or hypoplastic | Yes                    | No                          | No                    |
| 117 (father of 116)      | No            | No                                                |                                                 | G/A                             | G/G                                 |         |            |                             |         |                   |                                              |                                               |                             |                        |                             |                       |
| 118 (mother of 116)      | No            | Yes                                               |                                                 | G/Del                           | G/Del                               |         |            |                             |         |                   |                                              |                                               |                             |                        |                             |                       |
| 121                      | Yes           | Yes                                               | Maternal                                        | G/Del                           | G/Del                               | F       | 36         | Unknown                     | Unknown | Unknown           | Unknown                                      | Unknown                                       | Radii absent or hypoplastic | no                     | No                          | Yes                   |
| 145 (mother of 121)      | Yes           | Yes                                               | Unknown                                         | G/Del                           | G/Del                               | M       | Unknown    | Unknown                     | Unknown | Unknown           | Unknown                                      | Unknown                                       | Unknown                     | Unknown                | Unknown                     | Unknown               |
| 120 (father of 121)      | No            | No                                                |                                                 | G/G                             | G/G                                 |         |            |                             |         |                   |                                              |                                               |                             |                        |                             |                       |
| 122                      | Yes           | Yes                                               | Unknown                                         | A/Del                           | G/Del                               | M       | Unknown    | Unknown                     | Unknown | Unknown           | Unknown                                      | Unknown                                       | Unknown                     | Unknown                | Unknown                     | Unknown               |
| 123                      | Yes           | Yes                                               | Unknown                                         | G/Del                           | C/Del                               | Unknown | Unknown    | Unknown                     | Unknown | Unknown           | Unknown                                      | Unknown                                       | Unknown                     | Unknown                | Unknown                     | Unknown               |
| 124                      | Yes           | Yes                                               | Unknown                                         | A/Del                           | G/Del                               | F       | 22         | Unknown                     | Unknown | Bruising          | Unknown                                      | Unknown                                       | Radii absent or hypoplastic | Yes                    | No                          | Yes                   |
| 125                      | Yes           | Yes                                               | Paternal                                        | A/Del                           | G/Del                               | Unknown | Unknown    | Unknown                     | Unknown | Unknown           | Unknown                                      | Unknown                                       | Unknown                     | Unknown                | Unknown                     | Unknown               |
| 126 (father of 125)      | No            | Yes                                               |                                                 | G/Del                           | G/Del                               |         |            |                             |         |                   |                                              |                                               |                             |                        |                             |                       |
| 127 (mother of 125)      | No            | No                                                |                                                 | A/G                             | G/G                                 |         |            |                             |         |                   |                                              |                                               |                             |                        |                             |                       |
| 128                      | Yes           | Yes                                               | Unknown                                         | G/Del                           | C/Del                               | F       | 8          | 41                          | 3544    | Bleeding          | 11                                           | 178                                           | Radii absent or hypoplastic | No                     | No                          | Yes                   |
| 129 (parent of 128)      | No            | No                                                |                                                 | G/G                             | G/C                                 |         |            |                             |         |                   |                                              |                                               |                             |                        |                             |                       |
| 134                      | Yes           | Yes                                               | Maternal                                        | A/Del                           | G/Del                               | Unknown | Unknown    | Unknown                     | Unknown | Unknown           | Unknown                                      | Unknown                                       | Unknown                     | Unknown                | Unknown                     | Unknown               |
| 132 (mother of 134)      | No            | Yes                                               |                                                 | G/Del                           | G/Del                               |         |            |                             |         |                   |                                              |                                               |                             |                        |                             |                       |
| 133 (father of 132)      | No            | No                                                |                                                 | G/A                             | G/G                                 |         |            |                             |         |                   |                                              |                                               |                             |                        |                             |                       |
| 136                      | Yes           | Yes                                               | Not Paternal                                    | A/Del                           | G/Del                               | Unknown | Unknown    | Unknown                     | Unknown | Unknown           | Unknown                                      | Unknown                                       | Unknown                     | Unknown                | Unknown                     | Unknown               |
| 135 (father of 136)      | No            | No                                                |                                                 | G/G                             | G/G                                 |         |            |                             |         |                   |                                              |                                               |                             |                        |                             |                       |
| 139                      | Yes           | Yes                                               | Unknown                                         | A/Del                           | G/Del                               | F       | 17         | 42                          | 3459    | Bleeding          | 20                                           | 55                                            | Radii absent or hypoplastic | No                     | No                          | Unknown               |
| 138 (parent of 138)      | No            | No                                                |                                                 | G/A                             | G/G                                 |         |            |                             |         |                   |                                              |                                               |                             |                        |                             |                       |
| 140                      | Yes           | Heterozygous for gain of stop codon 145509173 C/T | N/A                                             | G/A                             | G/C                                 | F       | 9          | Unknown                     | Unknown | Bleeding          | Unknown                                      | Unknown                                       | Unknown                     | Unknown                | Yes                         | Yes                   |
| 142                      | Yes           | Yes                                               | Paternal                                        | A/Del                           | G/Del                               | M       | 16         | 40                          | Unknown | Bleeding          | Unknown                                      | 78                                            | Radii absent or hypoplastic | Yes                    | No                          | No                    |
| 143 (mother of 142)      | No            | No                                                |                                                 | G/A                             | G/G                                 |         |            |                             |         |                   |                                              |                                               |                             |                        |                             |                       |
| 144 (father of 142)      | No            | Yes                                               |                                                 | G/Del                           | G/Del                               |         |            |                             |         |                   |                                              |                                               |                             |                        |                             |                       |

**Table 1 Genotype and phenotype for the TAR cases and healthy parents. Healthy individuals are on gray background. Unknown (Unkn.)**

| Forward primer sequence  | Reverse primer sequence | Chr1 region         | Description                                        |
|--------------------------|-------------------------|---------------------|----------------------------------------------------|
| CACGCCAGCCTCTGAGTT       | CCCTAATCTCAAACCACTTCCT  | 145501836-145502420 | upstream regulatory element                        |
| GGACGAGCAGGAGACAGATG     | CGCACCTGGCCTAAAAATTC    | 145502151-145502744 | upstream regulatory element                        |
| CAAAGCACACCCTGCACA       | CACCTCCTGGGTTCAGGTAA    | 145502469-145502949 | upstream regulatory element                        |
| GGCCAGCCTGGGTAGTATAA     | CCAGTCTGGGGACAAGAG      | 145506316-145506883 | promoter                                           |
| TGCACCACTGCACTCTTAGC     | TTTAGGCAGCGTGGTGTATG    | 145506650-145507248 | promoter                                           |
| GTCTCCCGGGTTCAACTG       | TCTAAATCCCTCCCTCTGCAC   | 145506920-145507559 | <i>RBM8A</i>                                       |
| GCCCAGCTAATCAGCTTCC      | TCCCTCTGCACGGTAAAAAC    | 145506991-145507549 | promoter                                           |
| TTTCCAGTTTGGGATGAAG      | GGGCGGAATCTCTAATCCAC    | 145507301-145507871 | <i>RBM8A</i>                                       |
| GCCGGCCTCACTGTTAAT       | TCAGTTTGTGAATGCTCTCTGG  | 145507354-145508033 | <i>RBM8A</i>                                       |
| GCCCGGTTAAGAGGAAG        | TTGTGAATGCTCTCTGGAACC   | 145507395-145508028 | <i>RBM8A</i>                                       |
| ATGGCCACAGAAACACTTCC     | CACCGCCTCCAGTCTTAGTG    | 145507474-145507924 | <i>RBM8A</i>                                       |
| AGTTAGCCTTTGATTGGTCAGC   | ACCCGTAGCTCCTGCCCTA     | 145507474-145508174 | <i>RBM8A</i>                                       |
| ATGGCCACAGAAACACTTCC     | TCCTCCTTTCTCCATTGTTC    | 145507474-145508174 | <i>RBM8A</i>                                       |
| ATGGCCACAGAAACACTTCC     | CCACAGACACGGATACCTCA    | 145507474-145508324 | <i>RBM8A</i>                                       |
| CGGGTCTTGGGTGGATTA       | CCACAGACACGGATACCTCA    | 145507842-145508324 | <i>RBM8A</i>                                       |
| GGGTCTTGGGTGGATTAGAGA    | TTTAAGCAGGCTCACAGGAA    | 145507843-145508430 | <i>RBM8A</i>                                       |
| GGGTTCCAGAGAGCATTAC      | GATATCTGTTCGCCTGTCG     | 145508007-145508606 | <i>RBM8A</i>                                       |
| CCTAGTAGGCAGGAGCTACG     | CCAACCACAGCAAACACAGA    | 145508105-145508692 | <i>RBM8A</i>                                       |
| CGCAGTAGGAATGGGTTCAG     | CCTGGGCTTCCTGTATGTT     | 145508355-145508958 | <i>RBM8A</i>                                       |
| GGCCAAGAGCAAAGTTGAAA     | CCCAGTCTATTTGTCCAAGG    | 145508691-145509284 | <i>RBM8A</i>                                       |
| TTGTCAGACACGCCAAAGAG     | CAATGATCCATACAGCCTTGC   | 145508736-145509438 | <i>RBM8A</i>                                       |
| TGGGTGAAGGAATACGAAC      | ATGGTGGCATGTGCCTGTA     | 145509079-145509626 | <i>RBM8A</i>                                       |
| GTGTTACCAGGGTGGATTG      | CATGCCTTTAGACAGCTGGA    | 145509508-145509946 | <i>RBM8A</i>                                       |
| GGGAGGGACTTCAGTTAGCA     | CCTGTTGCCTCTAGCATCATT   | 145510103-145510687 | <i>RBM8A</i>                                       |
| TGATAGAAATATGAAGCCACCAAG | AAGGATGAATTGGGAGGAGAC   | 145510458-145511028 | <i>RBM8A</i>                                       |
| AAGAGGCAGCAGAAGGTGAA     | CAGCCCAATAGCATTGGAA     | 145510814-145511453 | <i>RBM8A</i>                                       |
| GGCTTGAATATGATGCTGAACA   | GCCTGATCGTAACTCCAAACA   | 145511127-145511721 | <i>RBM8A</i>                                       |
| CCCCTCTGCGACAGTTTC       | GTCCCCATCCTCATCCATG     |                     | Allele-specific expression experiment              |
| GTAAAACGACGGCCAG         | CAGGAAACAGCTATGAC       |                     | Allele-specific expression experiment              |
| CCCCTCTGCGACAGTTTCC      | CGCCATCTCGCCTTCGA       |                     | Allele-specific expression experiment (genotyping) |

**Table 2** *Primer pair sequences used for Sanger sequencing of *RBM8A* locus and upstream regulatory element, and primer sequences for the allele-specific expression experiment and genotyping.*

| N=7504 individuals | Genotypes passed QC<br>(call rate) | Homozygous major* | Heterozygous* | Homozygous minor* | Estimated minor<br>allele frequency | Deviation from HWE<br>(exact test) | Association with<br>platelet count |
|--------------------|------------------------------------|-------------------|---------------|-------------------|-------------------------------------|------------------------------------|------------------------------------|
| 5'UTR G/A          | 7317 (97.5%)                       | 6879 (6402)       | 431 (396)     | 7 (7)             | 3.05%                               | P=0.84                             | P=0.87                             |
| Intronic G/C       | 7458 (99.4%)                       | 7396 (6879)       | 62 (59)       | 0 (0)             | 0.42%                               | P=1.0                              | P=0.99                             |

**Table 3** *Genotyping of the 5'UTR and intronic SNPs of the RBM8A gene in 7504 healthy individuals from the Cambridge BioResource and association with platelet count. \*Number of individuals with measured platelet count is indicated between parentheses.*

## Supplementary Figures

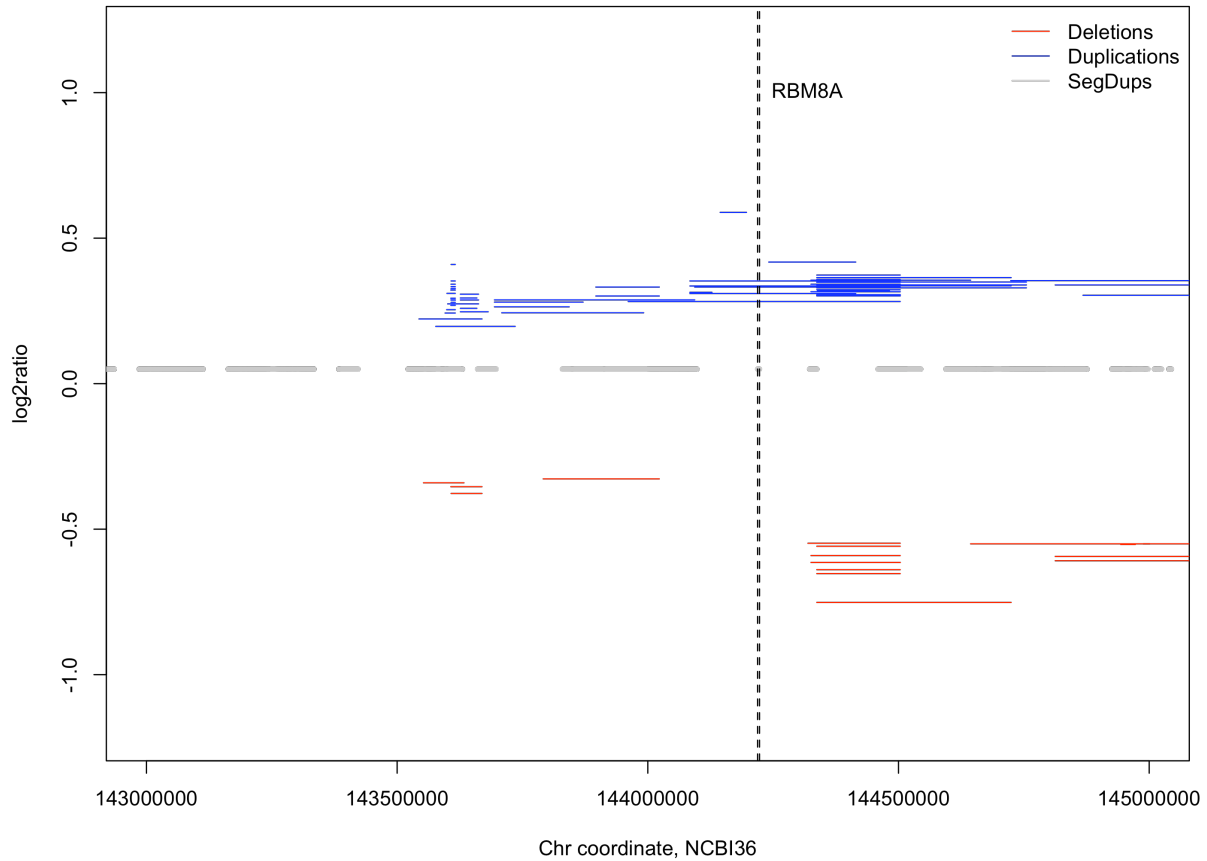

**Figure 1** *Copy number variants in the chromosome 1q21 locus.* The figure shows log<sub>2</sub>-ratios of Affy6 SNP array probe intensities for 5919 healthy Wellcome Trust Case Control Consortium shared controls. See ref. <sup>4</sup> for details on the calling of the copy number variants (CNV). There are no deletions of the *RBM8A* gene in these individuals, indicating a low frequency of the 1q21 deletions found in TAR cases and their healthy relatives. Five duplications were observed, which suggests that over-expression of *RBM8A* is not deleterious.

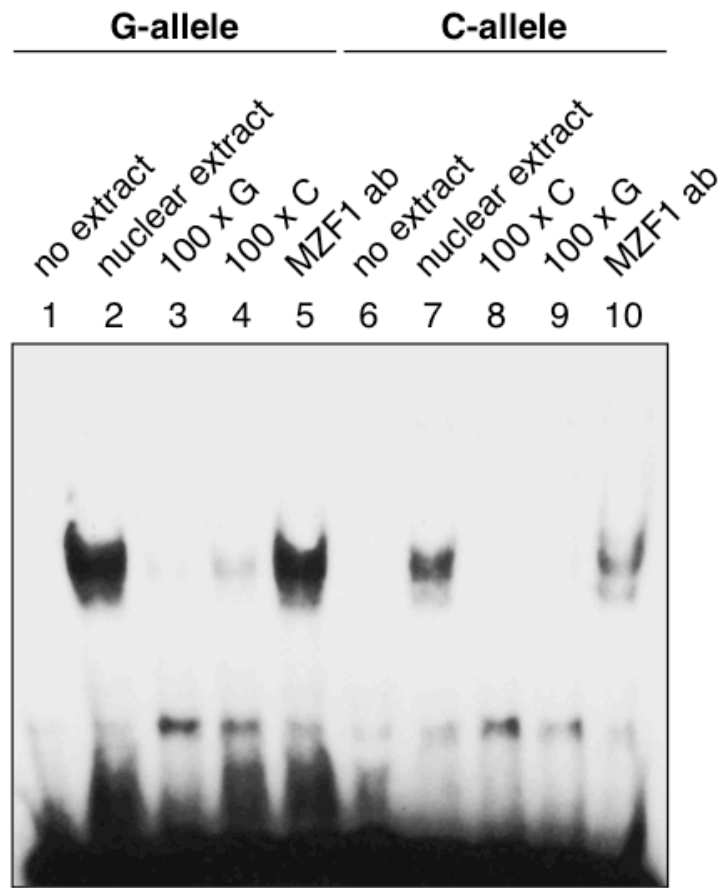

**Figure 2** *Differential binding of nuclear proteins at the intronic SNP.* Electrophoretic mobility shift assays (EMSA) in nuclear protein extracts from CHRF-288-11 cells showed higher protein affinity of the probe containing the G-allele (major allele of the RBM8A intronic SNP, lane 2) than the C-allele (minor allele, lane 7). Protein binding of G-allele-probes was competed by specific (lane 3), but not by unspecific unlabeled probes (lane 4). We performed supershift experiments with antibodies for the predicted transcription factors MZF1 and RBPJ. However, in our experiments none of the tested antibodies competed for binding and/or shifted the protein-DNA complex (lane 10, data not shown for RBPJ).

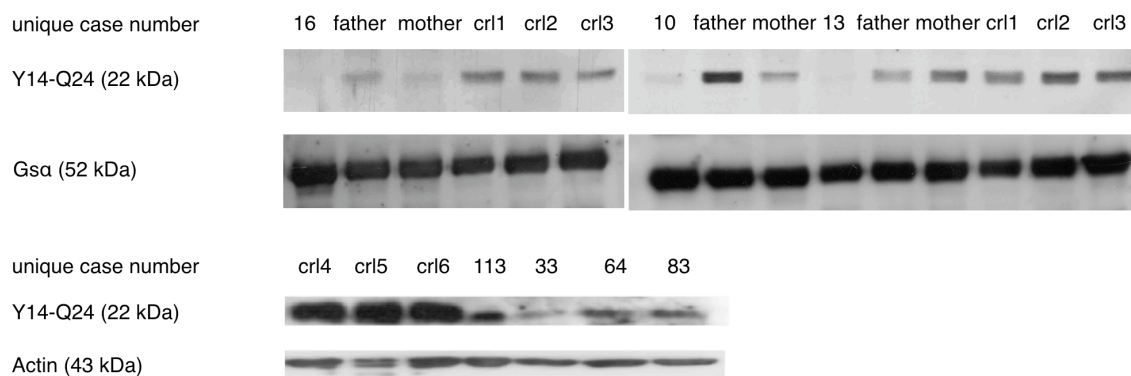

**Figure 3** *Y14* protein expression in platelets. Western blots are shown for TAR cases (indicated by numbers), their parents (indicated by father and mother to the right of the unique case number) and controls (Ctrl). Protein expression of Gs $\alpha$  and Actin were used as a loading control (bottom rows).



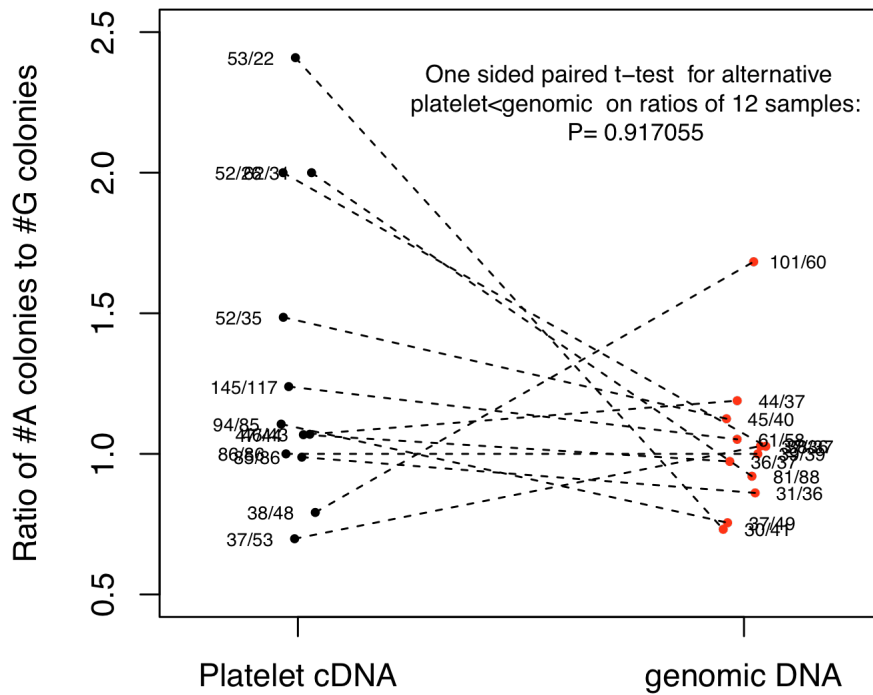

**Figure 4** *Allele-specific expression in platelet RNA for the 5'UTR SNP.* Expression of the major allele (G) and the minor allele (A) was determined for 12 healthy blood donors heterozygous for the 5'UTR SNP in platelet cDNA (black points) and in genomic DNA (red points) using a colony-PCR approach. Each data point represents one individual. A value of 1 on the vertical axis represents an expression ratio of one. The numbers next to the data points represent respectively the number of colonies with the minor allele and the number of colonies with the major allele. Jitter has been added to the positions on the horizontal axis. The paired t-test was performed on the ratios of the colony counts.

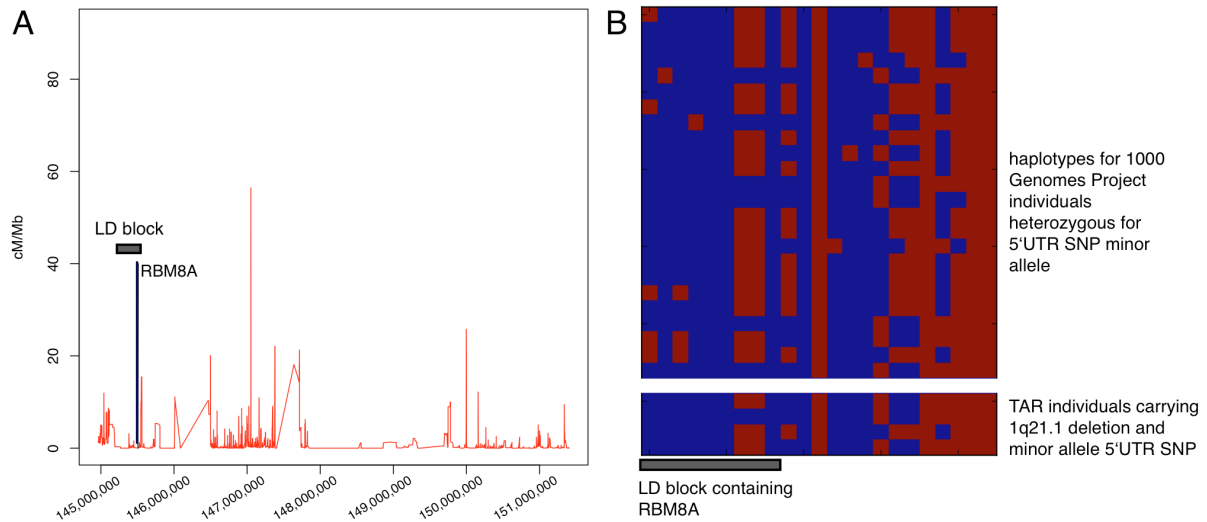

**Figure 5 Haplotype analysis of *RBM8A* locus. A) Recombination rates in the 1q21.1 locus in CEU individuals. The gray bar indicates the LD block containing *RBM8A*. B) 24 individuals of European descent from Phase 1 of the 1000 Genomes Project are heterozygous for the 5'UTR SNP (top) showing distinct haplotypes segregating in the LD block containing *RBM8A*. The haplotype on which the 5'UTR SNP minor allele present is shown. At least two of these haplotypes were present in the 4 exome sequenced TAR cases carrying the 5'UTR SNP minor allele (bottom).**

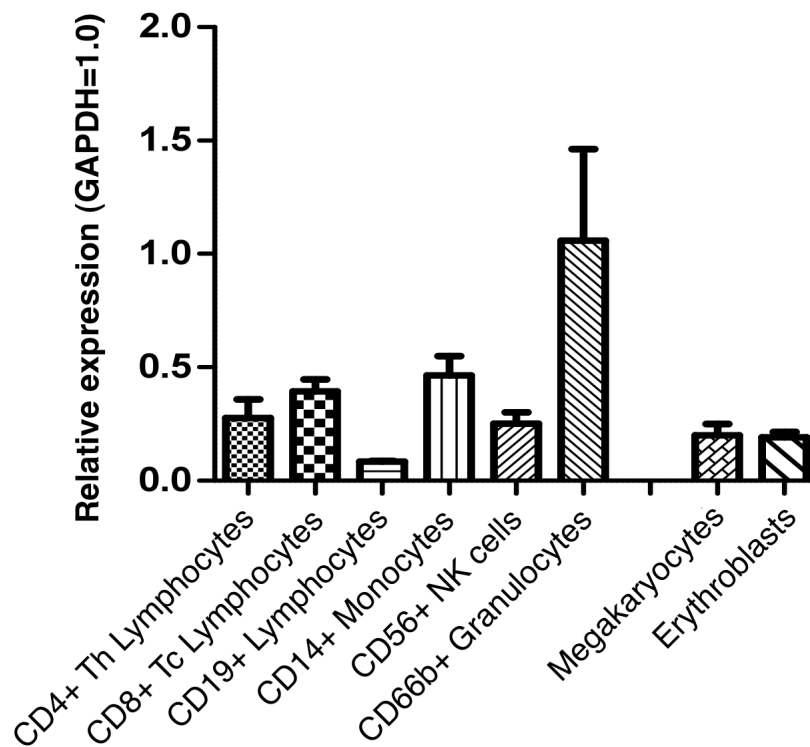

Figure 6 *RBM8A* gene expression in 8 hemopoietic lineages. Gene expression was determined using a TaqMan qPCR probe for *RBM8A* (catalog number *Hs04234933\_g1*, *Invitrogen, US*) and normalized with respect to the *GAPDH* gene. *RBM8A* is expressed in all lineages.

|            |                                                                 |
|------------|-----------------------------------------------------------------|
| human      | MADVLDLHEAGGEDFAMDEDGDSEIHKLKEKAKKRKGRGFGSEEGSRARMREDYDSVEQD    |
| rhesus     | MADVLDLHEAGGEDFAMDEDGDSEIHKLKEKAKKRKGRGFGSEEGSRARMREDYDSVEQD    |
| mouse      | MADVLDLHEAGGEDFAMDEDGDSEIHKLKEKAKKRKGRGFGSEEGSRARMREDYDSVEQD    |
| dog        | MADVLDLHEAGGEDFAMDEDGDSEIHKLKEKAKKRKGRGFGSEEGSRARMREDYDSVEQD    |
| elephant   | VSKVLGLHEAGDEDFPMDDEDGD---HQ--EKAKKRKDHGFGFEEGSRARMREDYDSVEQD   |
| opossum    | MADVLDLHEAGGEDFAMDEDGDSEIHKLKEKAKKRKGRGFGSEEGSRARMREDYDSVEQD    |
| xenopus t. | VAGVPAPQEAEGKDSMHRKGFZSIHKLKEKAKKRKGRGFGADEGTRARIREDYDSVEQD     |
| zebrafish  | MADVLDLHEAGGEDFPMDDEDGDSEIHKLKEKAKKRKGRGFGSEEGARSRVREDYDTVEQD   |
| human      | GDEPGPQRSVEGWILFVTGVHEEATEEDIHDKFAEYGEIKNIHLNLDLDRRTGYLKGTYLVE  |
| rhesus     | GDEPGPQRSVEGWILFVTGVHEEATEEDIHDKFAEYGEIKNIHLNLDLDRRTGYLKGTYLVE  |
| mouse      | GDEPGPQRSVEGWILFVTGVHEEATEEDIHDKFAEYGEIKNIHLNLDLDRRTGYLKGTYLVE  |
| dog        | GDEPGPQRSVEGWILFVTGVHEEATEEDIHDKFAEYGEIKNIHLNLDLDRRTGYLKGTYLVE  |
| elephant   | G-EPGPQCSVEGWIVFVIGMCEETTEEDIHDRFAEYGEIKNIHLNLDLDRRTGYLKGTYLVE  |
| opossum    | GDEPGPQRSVEGWILFVTGVHEEATEEDIHDKFAEYGEIKNIHLNLDLDRRTGYLKGTYLVE  |
| xenopus t. | GDEPGPQR-----                                                   |
| zebrafish  | GDEPGPQRSVEGWILFVTGVHEEATEEDVHDKFAEFGGEIKNIHLNLDLDRRTGYLKGTYLVE |
| human      | YETYKEAQAAMEGLNGQDLMGQPI SVDWCFVRGPPKGKRRGRRRSRSPDRRRRZ         |
| rhesus     | YETYKEAQAAMEGLNGQDLMGQPI SVDWCFVRGPPKGKRRGRRRSRSPDRRRRZ         |
| mouse      | YETYKEAQAAMEGLNGQDLMGQPI SVDWCFVRGPPKGKRRGRRRSRSPDRRRRZ         |
| dog        | YETYKEAQAAMEGLNGQDLMGQPI SVDWCFVRGPPKGKRRGRRRSRSPDRRRRZ         |
| elephant   | YETYKEVQAAVEGLSGQDSMGQPI SVDRRFVWGLSKNKR--AZRRRSRSPDRRRRZ       |
| opossum    | YETYKEAQAAMEGLNGQDLMGQPI SVDWCFVRGPPKGKRRGRRRSRSPDRRRRZ         |
| xenopus t. | -----WC FVRGPPKGKRRSRRRSRSPERRRR-                               |
| zebrafish  | YETYKEAQAAMEGLNGQELMGQPI SVDWCFVRGPPKSKRRGRRRSRSPDRRRRZ         |

**Figure 7 Protein alignments of Rbm8a in 8 species. Differences with the human protein sequence are highlighted in grey.**

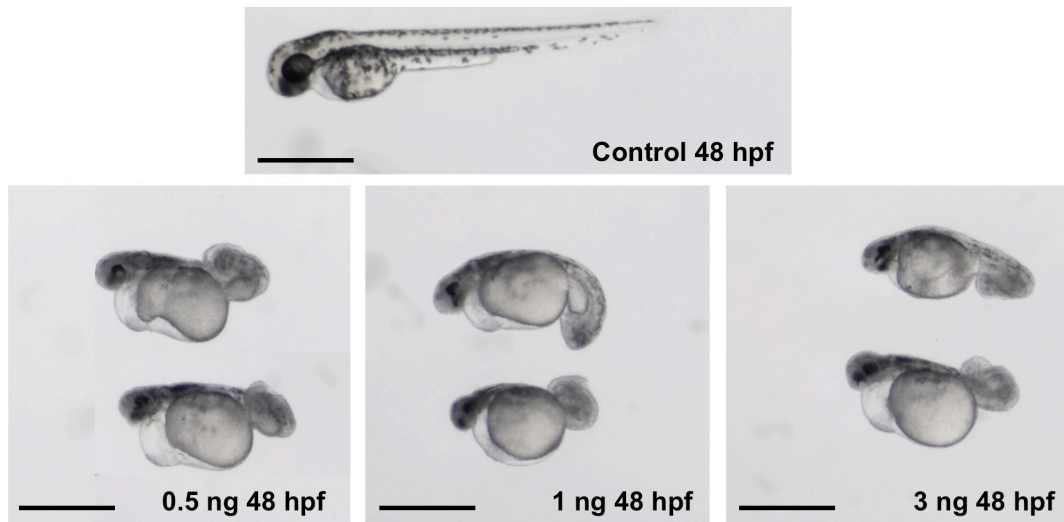

**Figure 8** *The protein encoded by *rbm8a* is required for early zebrafish development.* To evaluate the biological importance of *rbm8a* in hemopoiesis in zebrafish embryos, we adopted the morpholino antisense (MO) knockdown approach in order to block the expression of the endogenous gene. First we performed dose response experiment and injected 0.5-, 1-, 3- and 6-ng of *rbm8a* MO into wild-type zebrafish embryos at the 1-2 cell stage. Embryos injected with 6-ng of MO died within 24 hours post-fertilization (hpf); 0.5-, 1- and 3-ng MO injected embryos had gross developmental defects at 48 hpf. Even at lower doses of the MO, 0.5-, 1- and 3-ng, morphological abnormalities and loss of viability were still evident, although some embryos did survive beyond 24 hpf. These effects from a single knock-down MO are atypical and dramatic, and certainly more extensive than those seen from similar experiments for other genes implicated in hemopoiesis<sup>5-8</sup>. These data are compatible with the notion that the protein encoded by *rbm8a* is required for early zebrafish development. Scale bars represent ~0.5 mm.

## References

1. Klopocki, E. et al. Complex Inheritance Pattern Resembling Autosomal Recessive Inheritance Involving a Microdeletion in Thrombocytopenia-Absent Radius Syndrome. *The American Journal of Human Genetics* **80**, 232-240 (2007).
2. Genome-wide association study of 14,000 cases of seven common diseases and 3,000 shared controls. *Nature* **447**, 661-678 (2007).
3. Soranzo, N. et al. A genome-wide meta-analysis identifies 22 loci associated with eight hematological parameters in the HaemGen consortium. *Nat Genet* **41**, 1182-1190 (2009).
4. Huang, N., Lee, I., Marcotte, E.M. & Hurles, M.E. Characterising and Predicting Haploinsufficiency in the Human Genome. *PLoS Genet* **6**, e1001154 (2010).
5. Cvejic, A., Serbanovic-Canic, J., Stemple, D.L. & Ouwehand, W.H. The role of meis1 in primitive and definitive hematopoiesis during zebrafish development. *Haematologica* **96**, 190-198 (2011).
6. O'Connor, M.N. et al. Functional genomics in zebrafish permits rapid characterization of novel platelet membrane proteins. *Blood* **113**, 4754-4762 (2009).
7. Serbanovic-Canic, J. et al. Silencing of RhoA nucleotide exchange factor, ARHGEF3 reveals its unexpected role in iron uptake. *Blood* **118**, 4967-4976 (2011).
8. Tijssen, M.R. et al. Genome-wide Analysis of Simultaneous GATA1/2, RUNX1, FLI1, and SCL Binding in Megakaryocytes Identifies Hematopoietic Regulators. *Developmental Cell* **20**, 597-609 (2011).
